# Supplementary material for: Role of Inflammatory Cytokines in Rheumatoid Arthritis and Development of Atherosclerosis: A Systematic Review
Source: Preprints.org preprint supplement (doi:10.20944/preprints202308.0435.v1), 2023-08-07
Supplement: Supplementary file 1 [file supplementary]

| FIRST AUTHOR         | STUDY TYPE                             | YEAR OF PUBLICATION | MAYOR AREA IN ARTICLE                 | SUBJECT OF STUDY                                    | NUMBER OF STUDIES AND PARTICIPANTS (CUMULATIVE FOR REVIEWS AND MEHTA-ANALYSES) | MAYOR LIMITATIONS AND OBSERVATIONS                                                                                                           |
|----------------------|----------------------------------------|---------------------|---------------------------------------|-----------------------------------------------------|--------------------------------------------------------------------------------|----------------------------------------------------------------------------------------------------------------------------------------------|
| Mitchell, D. M       | PROSPECTIVE LONGITUDINAL STUDY         | 1986.               | GENERAL INFORMATIONS                  | MORTALITY                                           | 805 PARTICIPANTS                                                               |                                                                                                                                              |
| Scott, D. L.         | PROSPECTIVE LONGITUDINAL STUDY         | 1987.               | GENERAL INFORMATIONS                  | MORTALITY                                           | 112 PARTICIPANTS                                                               | ONE CENTRE STUDY, OLD THERAPY                                                                                                                |
| Arnett, F. C.        | COMPARATIVE STUDY                      | 1988.               | GENERAL INFORMATIONS                  | REVISED RA CLASSIFICATION 1987. CRITERIA            | 524 PARTICIPANTS                                                               |                                                                                                                                              |
| Aletaha, D.          | SYSTEMATIC REVIEW OF COHORT STUDIES    | 2010.               | GENERAL INFORMATIONS                  | EULAR 2010 RA CLASIFFICION CRITERIA                 | 3115 PARTICIPANTS                                                              |                                                                                                                                              |
| Lee, D. M.           | REVIEW                                 | 2001.               | GENERAL INFORMATIONS                  | PATOPHYSIOLOGY, THERAPY                             | 93 STUDIES                                                                     |                                                                                                                                              |
| Symmons, D. P. M.    | REVIEW                                 | 2002.               | GENERAL INFORMATIONS                  | EPIDEMIOLOGY                                        | 78 STUDIES                                                                     |                                                                                                                                              |
| Sakai, R.            | POPULATION BASED CROSS SECTIONAL STUDY | 2016.               | GENERAL INFORMATIONS                  | CVD PREVALENCE                                      | 2762 RA AND 27620 NON-RA PARTICIPANTS                                          |                                                                                                                                              |
| Koivuniemi, R.       | PROSPECTIVE LONGITUDINAL STUDY         | 2009.               | GENERAL INFORMATIONS                  | AUTOPSY STUDY OF CVD                                | 960 PARTICIPANTS                                                               | ONE CENTRE STUDY, OLD THERAPY                                                                                                                |
| Maradit-Kremers, H.  | POPULATION BASED COHORT STUDY          | 2005.               | GENERAL INFORMATIONS                  | CVD, CV RISK                                        | 603 PARTICIPANTS                                                               |                                                                                                                                              |
| Sokka, T.            | REVIEW                                 | 2009.               | GENERAL INFORMATIONS                  | MORTALITY OF CVD                                    | 124 STUDIES, > 100000 PARTICIPANTS                                             |                                                                                                                                              |
| Meune, C.            | MEHTA-ANALYSIS                         | 2010.               | GENERAL INFORMATIONS                  | MORTALITY OF ACUTE MYOCARDIAL INFARCTION AND STROKE | 17 STUDIES, > 124894 PARTICIPANTS                                              | SIGNIFICANT HETEROGENEITY FOR AIM AND STROKE REPORTS, STANDARDIZED MORTALITY RATIO AND INCIDENCE RATE RATIO NOT ADJUSTED FOR CV RISK FACTORS |
| Meune, C.            | MEHTA-ANALYSIS                         | 2009.               | GENERAL INFORMATIONS                  | CVD, CV RISK                                        | 17 STUDIES, > 91916 PARTICIPANTS                                               | SIGNIFICANT HETEROGENEITY AMONG STUDIES,                                                                                                     |
| Avina-Zubieta, J. A. | MEHTA-ANALYSIS                         | 2008.               | GENERAL INFORMATIONS                  | CV RISK                                             | 24 STUDIES, >111758 PARTICIPANTS                                               | SIGNIFICANT HETEROGENEITY AMONG STUDIES, ONE SUBGROUP DID NOT SHOW SIGNIFICANTLY INCREASED RISK FOR CVD                                      |
| Meyer, P. W. A.      | REVIEW                                 | 2018.               | GENERAL INFORMATIONS<br>CHRONIC INFL. | INFLAMMATION MECHANISMS, CV RISK, TEHRAPY           | 55 STUDIES WITH LARGE NUMBER OF PARTICIPANTS                                   | NARRATIVE REVIEW                                                                                                                             |
| Siebert, S.          | POPULATION BASED CROSS SECTIONAL STUDY | 2016.               | GENERAL INFORMATIONS                  | CVD AND DIABERES PREVALENCE                         | > 502649 PARTICIPANTS                                                          | CROSS SECTIONAL STUDY, SELF REPORT ON DIAGNOSIS AND THERAPY                                                                                  |

|                                       |                                        |       |                          |                                  |                                       |                                                                                                                                                                                                                                                                                                                        |
|---------------------------------------|----------------------------------------|-------|--------------------------|----------------------------------|---------------------------------------|------------------------------------------------------------------------------------------------------------------------------------------------------------------------------------------------------------------------------------------------------------------------------------------------------------------------|
| Van Doornum, S.                       | REVIEW                                 | 2002. | GENERAL INFORMATIONS     | MORTALITY, CV RISK, INFLAMMATION | 30 STUDIES, > 200000 PARTICIPANTS     | 4 HAD STUDIES NO INCREASED MORTALITY, INACCURATE DEATH CERTIFICATE SUSPECTED, STUDY HETEROGENEITY                                                                                                                                                                                                                      |
| Frank L J Visseren and ESC Task Force | MEHTA-ANALYSIS FOR GUIDELINES          | 2021. | TRADITIONAL RISK FACTORS | GUIDELINES                       | > 800 STUDIES ANALYZED BY TASK FORCE  |                                                                                                                                                                                                                                                                                                                        |
| Panoulas VF.                          | REVIEW                                 | 2008. | TRADITIONAL RISK FACTORS | HA PREVALENCE                    | 31 STUDIES, > 30 MILLION PARTICIPANTS |                                                                                                                                                                                                                                                                                                                        |
| Innala L.                             | PROSPECTIVE CLINICAL STUDY             | 2016. | TRADITIONAL RISK FACTORS | RA COMORBIDITIES, INFLAMMATION   | 950 PARTICIPANTS                      |                                                                                                                                                                                                                                                                                                                        |
| Erba G                                | PROSPECTIVE CLINICAL STUDY             | 2015. | TRADITIONAL RISK FACTORS | CVD, CV RISK SCORES              | 198 PARTICIPANTS                      |                                                                                                                                                                                                                                                                                                                        |
| Gherghe AM.                           | COMPARATION OF CROSS SECTIONAL STUDIES | 2015. | TRADITIONAL RISK FACTORS | HA PREVALENCE                    | 1334 PARTICIPANTS                     | SELF REPORTING COMORBIDITIES (There is a trend for decrease in the prevalence of CVD in the French population. Data from DESIR were collected during the same period as the general population data, but the ESPOIR data were gathered prior to that date, which might have an influence when comparing comorbidities) |
| Boyer JF.                             | MEHTA-ANALYSIS                         | 2011. | TRADITIONAL RISK FACTORS | CV RISK PREVALENCE               | 6669 PARTICIPANTS                     | SIGNIFICANT HETEROGENEITY AMONG STUDIES FOR DIABETES AND HDL.                                                                                                                                                                                                                                                          |
| Heliovaara, M.                        | PROSPECTIVE STUDY                      | 1993. | TRADITIONAL RISK FACTORS | SMOKING                          | 52818 PARTICIPANTS                    |                                                                                                                                                                                                                                                                                                                        |
| Castellanos-De La Hoz, J.             | MEHTA-ANALYSIS                         | 2013. | TRADITIONAL RISK FACTORS | SMOKING                          | 27 STUDIES                            |                                                                                                                                                                                                                                                                                                                        |
| Klareskog, L.                         | POPULATION BASED CASE CONTROL STUDY    | 2006. | TRADITIONAL RISK FACTORS | SMOKING, GENOTYPE                | > 90000 PARTICIPANTS                  | CASE CONTROL STUDY                                                                                                                                                                                                                                                                                                     |
| Welsing, P. M. J.                     | PROSPECTIVE STUDY                      | 2001. | TRADITIONAL RISK FACTORS | FUNCTIONAL CAPACITY              | 378 PARTICIPANTS                      | JOINT DESTRUCTION AND FUNCTION CAPACITY WAS NOT ALWAYS DETERMINATE AT SAME TIME, 1.5 MONTHS TO 3 YEARS DERIVATION WERE ACCEPTABLE                                                                                                                                                                                      |
| Piepoli, M. F. and ESC task force     | MEHTA-ANALYSIS FOR GUIDELINES          | 2016. | TRADITIONAL RISK FACTORS | GUIDELINES 2016 VERSION          | > 570 STUDIES ANALYZED BY TASK FORCE  | UPDATED IN 2021                                                                                                                                                                                                                                                                                                        |

|                             |                                     |       |                                                   |                                                         |                                                     |                                                                                                                                                                                               |
|-----------------------------|-------------------------------------|-------|---------------------------------------------------|---------------------------------------------------------|-----------------------------------------------------|-----------------------------------------------------------------------------------------------------------------------------------------------------------------------------------------------|
| Baghdadi LR.                | MEHTA-ANALYSIS                      | 2015. | TRADITIONAL RISK FACTORS                          | CV RISK                                                 | 10 STUDIES, > 4388 PARTICIPANTS                     | ONE STUDY WAS CASE CONTROL, SEVEN WAS RETROSPECTIVE COHORTS, ONE WAS CROSS SECTIONAL                                                                                                          |
| Jiang, P.                   | MEHTA-ANALYSIS                      | 2015. | TRADITIONAL RISK FACTORS                          | DIABETES                                                | 19 STUDIES, > 1.3 MILLION PARTICIPANTS              | 11 CASE CONTROL STUDIES                                                                                                                                                                       |
| Guin, A.                    | PROSPECTIVE STUDY                   | 2019. | TRADITIONAL RISK FACTORS                          | INFLAMMTION, ATHEOSCLEROSIS, DMARDs                     | 83 PARTICIPANTS                                     | LIKELIHOOD OF LONG DURATION RA PATIENTS HAVE HIGHER HOMA-IR IS QUITE HIGH BUT STUDY SAMPLE IS SMALL.                                                                                          |
| Dougados, M.                | INTERNATIONAL CROSS SECTIONAL STUDY | 2020. | TRADITIONAL RISK FACTORS                          | CVD, CV RISK                                            | 3920 PARTICIPANTS                                   | NOT ALL COMORBIDITIES INCLUDES SUCH TUBERCULOSIS, QUESTIONABLE ENROLMENT AND DISEASE ACTIVITY ASSESSMENT, DIVERSE IN QUESTIONS INTERPRETATION IN FORMS, DIFFERENCES IN DEPRESSION PREVALENCE. |
| Stavropoulos-Kalinoglou, A. | CROSS SECTION STUDY                 | 2007. | TRADITIONAL RISK FACTORS                          | BMI                                                     | 641 PARTICIPANTS                                    | CROSS SECTION STUDY ON ASIAN POPULATION                                                                                                                                                       |
| Castro, L.L.                | CROSS SECTION STUDY                 | 2018. | TRADITIONAL RISK FACTORS                          | CV RISK                                                 | 133 PARTICIPANTS                                    | CROSS SECTION STUDY                                                                                                                                                                           |
| Beinsberger, J.             | REVIEW                              | 2014. | TRADITIONAL RISK FACTORS AND CHRONIC INFLAMMATION | RA AGRAVATES CVD                                        | 55 STUDIES                                          |                                                                                                                                                                                               |
| Nowak, B.                   | PROSPECTIVE OBSERVATIONAL STUDY     | 2016. | TRADITIONAL RISK FACTORS AND CHRONIC INFLAMMATION | CV RISK, ESR, DURATON AND ACTIVITY OF RA, ANTI-CCP, LDL | 61 PARTICIPANTS                                     |                                                                                                                                                                                               |
| Giles, J. T.                | MEHTA-ANALYSIS                      | 2011. | TRADITIONAL RISK FACTORS AND CHRONIC INFLAMMATION | LDL                                                     | 4 STUDIES, 6035 PARTICIPANTS                        | ONLY 4 COHORT STUDIES WITH DIFFERENCES IN INCLUSION/EXCLUSI ON CRITERIA, DATA COLLECTED, GEOGRAPHIC LOCATION, LIMITED STATISTICAL POWER IN SUBGROUP ANALYSES                                  |
| McGrath, C. M.              | REVIEW                              | 2015. | TRADITIONAL RISK FACTORS AND CHRONIC INFLAMMATION | LIPID METABOLISAM, LIPID PARADOX                        | 100 STUDIES, > 9000 PARTICIPANTS                    | NUMBER ANT TYPE OF ANALYZED STUDIES MISSING                                                                                                                                                   |
| Gregersen, P. K.            | REVIEW                              | 1987. | CHRONIC INFLAMMATION                              | GENETIC STUDY, CCP                                      | 11 STUDES ON ANIMALS AND LAB. INVESTIGATIONS FOR RA |                                                                                                                                                                                               |

|                        |                            |       |                      |                                                                     |                  |                                                                                                                    |
|------------------------|----------------------------|-------|----------------------|---------------------------------------------------------------------|------------------|--------------------------------------------------------------------------------------------------------------------|
| McInnes, I. B.         | REVIEW                     | 2011. | CHRONIC INFLAMMATION | SYNOVITIS IN RA, PATHOGENESIS OF ORGAN DAMAGE IN RA                 | 174 STUDIES      |                                                                                                                    |
| Wang, D.               | REVIEW                     | 2019. | CHRONIC INFLAMMATION | LUNG DISEASE IN RA                                                  | 169 STUDIES      |                                                                                                                    |
| Londei, M.             | CASE REPORT                | 1987. | CHRONIC INFLAMMATION | INFLAMMATION MECHANISMS - GENETIC ANALYZE                           | 1 CASE REPORT    | CASE REPORT                                                                                                        |
| Glant, T. T.           | PROSPECTIVE STUDY          | 2011. | CHRONIC INFLAMMATION | INFLAMMATION MECHANISMS                                             | STUDY ON ANIMALS |                                                                                                                    |
| Verheijden, G. F. M.   | PROSPECTIVE STUDY          | 2011. | CHRONIC INFLAMMATION | INFLAMMATION MECHANISMS, DETECTING RF AND ANTI-CCP ON ANIMAL MODELS | STUDY ON ANIMALS |                                                                                                                    |
| Smolen, J. S.          | REVIEW                     | 2018. | CHRONIC INFLAMMATION | INFLAMMATION MECHANISMS, EPIDEMIOLOGY, DIAGNOSIS, TREATMENT OF RA   | 261 STUDIES      |                                                                                                                    |
| Burmester, G. R.       | REVIEW                     | 2014. | CHRONIC INFLAMMATION | INFLAMMATION MECHANISMS, CYTOKINE DIRECTED THERAPIES                | 134 STUDIES      |                                                                                                                    |
| Carbone, F.            | REVIEW                     | 2020. | CHRONIC INFLAMMATION | INFLAMMATION MECHANISMS, ATHEROSCLEROSIS, CVD                       | 204 STUDIES      |                                                                                                                    |
| Mewar, D.              | CROSS SECTIONAL STUDY      | 2006. | CHRONIC INFLAMMATION | INFLAMMATION MECHANISMS - RADIOGRAPHIC STUDY, ANTI-CCP, RF          | 872 PARTICIPANTS | POTENTIAL BIAS WITH PATIENTS WITH MILD DISEASE                                                                     |
| Sokolove, J.           | PROSPECTIVE STUDY          | 2012. | CHRONIC INFLAMMATION | INFLAMMATION MECHANISMS, ANTI-CCP                                   | 162 PARTICIPANTS | LABORATORY METHODOLOGY LIMITATIONS WITH SERONEGATIVE RA, OVERESTIMATE ANTI CCP RESULTS IN YOUNGER POPULATION       |
| Lopez-Longo, F. J.     | RETROSPECTIVE COHORT STUDY | 2009. | CHRONIC INFLAMMATION | INFLAMMATION MECHANISMS, ANTI-CCP, CVD                              | 937 PARTICIPANTS | ANTI-CCP HAS LOW FREQUENCY IN ISCHEMIC CVD AND HIGH IN RA                                                          |
| Sokolove, J.           | CROSS SECTION STUDY        | 2013. | CHRONIC INFLAMMATION | CHRONIC INFLAMMATION - ANTI CCP, ATHEROSCLEROSIS                    | 134 PARTICIPANTS | INABILITY TO DEMONSTRATE DIRECT ANTI-CCP COMPLEX IN PLAQUES DO TO UNAVAILABILITY OF RAPID AUTOPSY TISSUE SPECIMENS |
| Geraldino-Pardilla, L. | CROSS SECTION STUDY        | 2018. | CHRONIC INFLAMMATION | INFLAMMATION MECHANISMS, FDG UPTAKE INFLAMMATION DETECTION, CV RISK | 91 PARTICIPANTS  | CROSS SECTION STUDY, FALSE POSITIVE FDG UPTAKE                                                                     |

|                   |                                    |       |                                      |                                                                                                    |                                   |                                                                                                                                                                                                                             |
|-------------------|------------------------------------|-------|--------------------------------------|----------------------------------------------------------------------------------------------------|-----------------------------------|-----------------------------------------------------------------------------------------------------------------------------------------------------------------------------------------------------------------------------|
| DeMizio, D. J.    | REVIEW                             | 2020. | CHRONIC INFLAMMATION AND MEDICATIONS | INFLAMMATION MECHANISMS AND MEDICATIONS - CV DEATH, CV RISK, INFLAMMATION MARKERS, ATHEROSCLEROSIS | 90 STUDIES, > 100000 PARTICIPANTS |                                                                                                                                                                                                                             |
| Liang, K. P.      | POPULATION BASED PROSPECTIVE STUDY | 2009. | CHRONIC INFLAMMATION                 | CVD, MORTALITY, ANTI CCP, ANA                                                                      | 14934 PARTICIPANTS                | LACK OF CRP VALUES, SMALL NUMBER OF ANTI-CCP POSITIVE PARTICIPANTS, LACK OF VALIDATION OF CONFOUNDING, COMORBIDITIES, RA AND CVD ASSESSMENTS ACCORDING TO ESTABLISHED CRITERIA                                              |
| Humphreys, J. H., | CLINICAL TRIAL                     | 2014. | CHRONIC INFLAMMATION                 | MORTALITY, ANTI-CCP, RHEUMATOID FACTOR                                                             | 4962 PARTICIPANTS                 | NO POOL ANALYZES FROM TWO COHORTS, STUDY DOES NOT ACCOUNT ALL PREDICTIONS OF MORTALITY IN RA, ASSUMPTION THAT ANTIBODY STATUS IS NOT FIXED IN RA                                                                            |
| McCoy, S. S.      | POPULATION BASED PROSPECTIVE STUDY | 2013. | CHRONIC INFLAMMATION                 | MYOCARDIAL INFARCTION                                                                              | 231 PARTICIPANTS                  | RETROSPECTIVE STUDY WITH DANA DEPENDENT ON DOCUMENTATION, NO DANA ABOUT DISEASE ACTIVITY IN TIME OF AIM, NO DANA ABOUT NSAID, CV RISK FACTORS, LIMITATIONS IN STUDY POWER IN RA SUBGROUP ANALYSIS                           |
| Mackey, R. H.     | PROSPECTIVE LONGITUDINAL STUDY     | 2015. | CHRONIC INFLAMMATION                 | INFLAMMATION MECHANISMS, CV RISK, MORTALITY                                                        | 160000 PARTICIPANTS               | PART OF RA WAS NOT DIAGNOSED BY CLINICAL EXAM, NO INFORMATION ON DISEASE DURATION, SOME ANTI-CCP RESULTS ARE QUESTIONABLE, POSSIBLE CONFOUNDING IN MEDICATION USE, SELF REPORTING ON CHOLESTEROL AND ANTILIPEMIC DRUGS USE. |
| Innala, L.        | LONG TERM PROSPECTIVE              | 2010. | CHRONIC INFLAMMATION                 | CVD, CV RISK, DMARD                                                                                | 442 PARTICIPANTS                  | RISK OF CONFOUNDING REGARDING                                                                                                                                                                                               |

|                         |                          |       |                      |                                                                                                                         |                                   |                                                                                                                                                     |
|-------------------------|--------------------------|-------|----------------------|-------------------------------------------------------------------------------------------------------------------------|-----------------------------------|-----------------------------------------------------------------------------------------------------------------------------------------------------|
|                         | OBSERVATIONAL STUDY      |       |                      |                                                                                                                         |                                   | MEDICATIONS EFFECTS                                                                                                                                 |
| Pawlik A.               | CROSS SECTION STUDY      | 2003. | CHRONIC INFLAMMATION | INFLAMMATION MECHANISMS - CD4, CD 28 CELLS, CVD                                                                         | 42 PARTICIPANTS                   | CROSS SECTION STUDY                                                                                                                                 |
| Winchester, R.          | PROSPECTIVE COHORT STUDY | 2016. | CHRONIC INFLAMMATION | INFLAMMATION MECHANISMS - CORONARY ARTERY CALCIFICATIONS, MONONUCLEAR CELLS                                             | 73 PARTICIPANTS                   | STUDY DESIGN DOES NOT ALLOW TO DISTINGUISH BETWEEN TWO INTERPRETATION OF INFLAMMATORY ROLE IN ATHEROSCLEROSIS                                       |
| Nakajima, T.            | PROSPECTIVE STUDY        | 2003. | CHRONIC INFLAMMATION | INFLAMMATION MECHANISMS IN ACS<br>CD4+CD28null T CELLS HAVE UNIQUE GENE EXPRESSION PROFILE AVOIDING RECEPTOR ACTIVATION | 73 PARTICIPANTS                   |                                                                                                                                                     |
| Dumitriu, I. E.         | PROSPECTIVE STUDY        | 2010. | CHRONIC INFLAMMATION | INFLAMMATION MECHANISMS IN ACS<br>COSTIMULATORY PATHWAYS ARE ALTERED IN CD4(+)CD28(null) T CELLS.                       | 94 PARTICIPANTS                   |                                                                                                                                                     |
| Lopez-Mejias, R.        | REVIEW                   | 2016. | CHRONIC INFLAMMATION | INFLAMMATION MECHANISMS, CV RISK                                                                                        | 356 STUDIES                       |                                                                                                                                                     |
| Liuzzo, G.              | PROSPECTIVE STUDY        | 2005. | CHRONIC INFLAMMATION | INFLAMMATION MECHANISMS - ALTERATION OF T-CELL REPERTOIRE IS ASSOCIATED WITH CVD                                        | 120 PARTICIPANTS                  |                                                                                                                                                     |
| Libby, P.               | REVIEW                   | 2007. | CHRONIC INFLAMMATION | INFLAMMATION MECHANISMS, ENDOTHELIAL DYSFUNCTION, ATHEROSCLEROSIS                                                       | 55 STUDIES                        |                                                                                                                                                     |
| Swerdlow, D. I.         | MEHTA-ANALYSIS           | 2012. | CHRONIC INFLAMMATION | GENETIC STUDY OF IL6R IN CVD                                                                                            | 40 STUDIES, > 133449 PARTICIPANTS |                                                                                                                                                     |
| Kaptoge, S.             | MEHTA-ANALYSIS           | 2014. | CHRONIC INFLAMMATION | INFLAMMATION HYPOTHESIS IN VASCULAR DISEASES                                                                            | 29 STUDIES, > 17000 PARTICIPANTS  | TNF- $\alpha$ WERE MEASURED AT START IN CASE-COHORT STUDY OF 1514 PARTICIPANTS AND 833 INCIDENT CVD EVENTS IN POPULATION-BASED PROSPECTIVE COHORTS. |
| van den Oever, I. A. M. | REVIEW                   | 2014. | CHRONIC INFLAMMATION | THROMBOEMBOLIC RISK                                                                                                     | 31 STUDIES                        |                                                                                                                                                     |

|                  |                                        |       |                                      |                                                                                 |                                                                  |                                                                                                                                                                                                                                      |
|------------------|----------------------------------------|-------|--------------------------------------|---------------------------------------------------------------------------------|------------------------------------------------------------------|--------------------------------------------------------------------------------------------------------------------------------------------------------------------------------------------------------------------------------------|
| Small, H. Y.     | REVIEW                                 | 2018. | CHRONIC INFLAMMATION                 | HA, OXIDATIVE STRESS                                                            | 202 STUDIES                                                      |                                                                                                                                                                                                                                      |
| Peters, M. J. L. | PROSPECTIVE STUDY                      | 2009. | CHRONIC INFLAMMATION                 | THROMBOSIS IN RA                                                                | 42 PARTICIPANTS                                                  |                                                                                                                                                                                                                                      |
| Habets, K. L. L. | PROSPECTIVE STUDY                      | 2015. | CHRONIC INFLAMMATION                 | THROMBOSIS IN RA, ANTI-CCP                                                      | 86 PARTICIPANTS                                                  |                                                                                                                                                                                                                                      |
| Zhou, Z. W.      | MEHTA-ANALYSIS                         | 2020. | CHRONIC INFLAMMATION                 | PLATELETS IN CHR. INFLAMMATION                                                  | 34 STUDIES; 17 on RA, 12 on AS, 3 on PsA and 2 on both RA and AS |                                                                                                                                                                                                                                      |
| Agca, R.         | LONG TERM PROSPECTIVE STUDY            | 2020. | CHRONIC INFLAMMATION                 | CV RISK, INFLAMMATION INDEPENDANT CONTRIBUTOR                                   | 2893 PARTICIPANTS                                                | HOOB STUDY WAS 10 YEARS CAREE STUDY - POSSIBLE DIFFERENCES IN DEFINITIONS, DECLINE OF CVD IN PAST 10 YEARS - UNDERESTIMATION IN CV RISK, MTX AND BIOLOGICS ARE NOT REPRESENTATIVE AT STUDY BASLINE - CHANGES IN GUIDELINES OVER TIME |
| Cugno, M.        | REVIEW                                 | 2010. | CHRONIC INFLAMMATION                 | COAGULATION ACTIVATION, INCREASED VASCULAR PERMEABILITY                         | 48 STUDIES                                                       |                                                                                                                                                                                                                                      |
| Choy, E.         | REVIEW                                 | 2014. | CHRONIC INFLAMMATION AND MEDICATIONS | INFLAMMATION MECHANISMS AND MEDICATIONS - CV RISK, INFLAMMATION CONTROL THERAPY | 155 STUDIES                                                      |                                                                                                                                                                                                                                      |
| Carbone, F.      | REVIEW                                 | 2020. | CHRONIC INFLAMMATION                 | CV RISK, CVD, ATHEROSCLEROSIS, INFLAMMATION MECHANISMS                          | 204 STUDIES                                                      |                                                                                                                                                                                                                                      |
| Myasoedova, E.   | RETROSPECTIVE MULTICENTER COHORT STUDY | 2011. | CHRONIC INFLAMMATION                 | CVD, ESR, LIPID PARADOX                                                         | 651 PARTICIPANTS                                                 | NO CAUSAL RELATIONSHIP CAN NOT BE MADE BETWEEN OUTCOMES AND INFLAMMATION AND LIPIDS, RETROSPECTIVE STUDY                                                                                                                             |
| Ridker, P. M.    | RANDOMIZED DOUBLE-BLIND CLINICAL TRIAL | 2017. | CHRONIC INFLAMMATION AND MEDICATIONS | THERAPY, LDL                                                                    | 10061 PARTICIPANTS                                               |                                                                                                                                                                                                                                      |
| Goodson, N. J.   | PROSPECTIVE STUDY                      | 2009. | CHRONIC INFLAMMATION AND MEDICATIONS | CVD, MORTALITY, NSAID                                                           | 923 PARTICIPANTS                                                 | UNCLEAR CONFOUNDERS INFLUENCING DECISION TO AVOID NSAID USE IN RA                                                                                                                                                                    |

|                     |                                 |       |                                                   |                                                                                                                                                           |                               |                                                                                                                                                                                                                                                              |
|---------------------|---------------------------------|-------|---------------------------------------------------|-----------------------------------------------------------------------------------------------------------------------------------------------------------|-------------------------------|--------------------------------------------------------------------------------------------------------------------------------------------------------------------------------------------------------------------------------------------------------------|
| Gonzalez-Gay, M. A. | REVIEW                          | 2005. | CHRONIC INFLAMMATION, TRADITIONAL CV RISK FACTORS | TRADITIONAL CV RISK FACTORS, INFLAMMATION CONTRIBUTES SIGNIFICANTLY TO CV RISK                                                                            | 106 STUDIES                   |                                                                                                                                                                                                                                                              |
| Kerola, A. M.       | PROSPECTIVE STUDY               | 2013. | CHRONIC INFLAMMATION                              | STANDARDISED RATE RATIO FOR CORONARY DISEASE AND HA IN EARLY RA AND SERONEGATIVE IS AUGMENTED                                                             | 7209 PARTICIPANTS             |                                                                                                                                                                                                                                                              |
| Södergren, A.       | PROSPECTIVE STUDY               | 2010. | CHRONIC INFLAMMATION                              | IMT INCREASES WITH RA DURATION                                                                                                                            | 79 PARTICIPANTS               | LARGER RA GROUP, USE OF MEDICATIONS                                                                                                                                                                                                                          |
| González-Gay, MA.   | REVIEW                          | 2012. | CHRONIC INFLAMMATION                              | ENDOTHELIAL DYSFUNCTION                                                                                                                                   | 10 STUDIES                    |                                                                                                                                                                                                                                                              |
| Di Minno, MN.       | MEHTA-ANALYSIS                  | 2015. | CHRONIC INFLAMMATION                              | ENDOTHELIAL DYSFUNCTION                                                                                                                                   | 20 STUDIES, 1688 PARTICIPANTS |                                                                                                                                                                                                                                                              |
| Ambrosino, P.       | MEHTA-ANALYSIS                  | 2015. | CHRONIC INFLAMMATION                              | MORE ACTIVE INFLAMMATION INCREASES AORTIC AND ARTERIAL STIFFNESS RVRN IN EARLY STAGE.                                                                     | 25 STUDIES, 3055 PARTICIPANTS | CASE CONTROL STUDIES WITH HETEROGENEITY, DIFFERENT INCLUSION/EXCLUSION CRITERIA, DIFFERENT RA EARLY DIAGNOSIS DEFINITION AND ACTIVITY, MANY CV RISK FACTORS WHICH INFLUENCE STIFFNESS MEASUREMENTS, DIFFERENCES AMONG DEVICES AND TECHNIQUES USED IN STUDIES |
| Giles, J. T.        | MEHTA-ANALYSIS                  | 2019. | CHRONIC INFLAMMATION                              | LIPID PARADOX                                                                                                                                             | 4 STUDIES, 5825 PARTICIPANTS  | ONLY 4 COHORT STUDIES WITH DIFFERENCES IN INCLUSION/EXCLUSION CRITERIA, DATA COLLECTED, GEOGRAPHIC LOCATION, LIMITED STATISTICAL POWER IN SUBGROUP ANALYSES                                                                                                  |
| Paccou, J.          | CROSS SECTION COMPARATIVE STUDY | 2014. | CHRONIC INFLAMMATION                              | CORONARY AND AORTIC CALCIFICATIONS ARE MORE PREVALENT AND SEVERE IN RA, MTX CAN REDUCE IT, EROSION ARTITIS IS MAJOR DETERMINANT OF AORTIC CALCIFICATIONS. | 150 PARTICIPANTS              | CROSS SECTIONAL STUDY, INFLUENCE OF MTX DOSAGE AND DURATION WAS NOT VALIDATED, PROGNOSTIC SIGNIFICANCE OF CALCIFICATION PRESENCE, DIFFICULTY IN ESTIMATION OF CALCIFICATIONS IN ARTERIAL WALL BY MSCT, NON-CALCIFIED PLAQUES                                 |



|                      |                          |       |             |                                                                    |                                                                                        |                                                                                                                                                                 |
|----------------------|--------------------------|-------|-------------|--------------------------------------------------------------------|----------------------------------------------------------------------------------------|-----------------------------------------------------------------------------------------------------------------------------------------------------------------|
|                      |                          |       |             |                                                                    |                                                                                        | COULD NOT BE DIAGNOSED                                                                                                                                          |
| McGettigan, P.       | REVIEW                   | 2006. | MEDICATIONS | COX 2 INHIBITORS - ROFECOXIB AND CELCOXIB MAY NOT INCREASE CV RISK | 23 S                                                                                   | CASE-CONTROL OR COHORT DESIGN                                                                                                                                   |
| Kearney, P. M.       | MEHTA-ANALYSIS           | 2006. | MEDICATIONS | COX 2 INHIBITORS -SELECTIVE COX 2 INHIBITORS INCREASE CV RISK.     | 138 STUDIES, 145373 PARTICIPANTS                                                       | SMALL NUMBER OF ADVERSE EVENTS, LIMITED DANA ON CV RISK AND GASTROINTESTINAL EFFECTS                                                                            |
| Roubille, C.         | MEHTA-ANALYSIS           | 2015. | MEDICATIONS | TNF ALPHA INH, MTX, NSAID, GLUCOCORTICOID ES                       | 34 STUDIES (28 RA,6 PSA), 456734 PARTICIPANTS                                          | POSSIBLE UNDERPOWERED FOR MTX CV RISK LOWERING DETECTION                                                                                                        |
| Westlake, S. L.      | MEHTA-ANALYSIS           | 2011. | MEDICATIONS | TNF ALPHA INH, MTX                                                 | 20 STUDIES, 1688 PARTICIPANTS                                                          | OBSERVATIONAL STUDIES, 2 STUDIES HAVE SIGNIFICANT BIAS, CONFOUNDING factors: HIGH RA ACTIVITY HAS HIGH CV RISK, MTX USE, ADJUSTMENT OF BIOLOGICS TO RA ACTIVITY |
| Cabassi, A.          | REVIEW                   | 2020. | MEDICATIONS | NSAID                                                              | 111 STUDIES, > 7 MILLION PARTICIPANTS                                                  |                                                                                                                                                                 |
| Gargiulo, G.         | REVIEW                   | 2014. | MEDICATIONS | NSAID                                                              | 90 STUDIES, > 100000 PARTICIPANTS                                                      |                                                                                                                                                                 |
| Gasparian, A. Y.     | REVIEW                   | 2012. | MEDICATIONS | MTX, HYDROXYCHLORO QUINE                                           | 240 STUDIES                                                                            |                                                                                                                                                                 |
| Szeto, C. C.         | MEHTA-ANALYSIS           | 2020. | MEDICATIONS | NSAID                                                              | 329 STUDIES                                                                            |                                                                                                                                                                 |
| Zheng, L. Y.         | REVIEW                   | 2014. | MEDICATIONS | NSAID                                                              | 23 STUDIES                                                                             |                                                                                                                                                                 |
| Caldwell, B.         | MEHTA-ANALYSIS           | 2006. | MEDICATIONS | COX 2 INHIBITORS                                                   | PRIMARY 4 STUDIES WITH 4422 PARTICIPANTS , SECONDARY 6 STUDIES WITH 12780 PARTICIPANTS | FOR CELECOXIB ALL STUDIES WERE UNDERPOWERED TO DETECT CVD, PROBLEMS WITH REPORTING SIDE-EFFECTS AND ENDPOINTS.                                                  |
| Helin-Salmivaara, A. | LARGE CASE CONTROL STUDY | 2006. | MEDICATIONS | NSAID AND COX2 INHIBITORS                                          | 172258 PARTICIPANTS                                                                    |                                                                                                                                                                 |
| Schneeweiss, S.      | COMPARATIVE STUDY        | 2006. | MEDICATIONS | NSAID AND COX2 INHIBITORS                                          | 49711 PARTICIPANTS                                                                     |                                                                                                                                                                 |
| Fabule, J.           | COMPARATIVE STUDY        | 2014. | MEDICATIONS | NSAID AND COX2 INHIBITORS                                          | 19 STUDIES, > 22.5 MILLION PARTICIPANTS                                                | LOW OUTCOMES NUMBER, NOT ALL NSAIDs INCLUDED,                                                                                                                   |

|                                  |                                   |       |             |                                                         |                                  |                                                                                                                                                                                                                             |
|----------------------------------|-----------------------------------|-------|-------------|---------------------------------------------------------|----------------------------------|-----------------------------------------------------------------------------------------------------------------------------------------------------------------------------------------------------------------------------|
|                                  |                                   |       |             |                                                         |                                  | NO<br>CARDIOVASCULAR<br>SIDE EFFECTS<br>DETECTION OR<br>ANALYSES                                                                                                                                                            |
| del Rincon, I.                   | RANDOMIZED<br>CONTROLLED<br>TRIAL | 2014. | MEDICATIONS | GLUCOCORTICOID<br>ES                                    | 779 PARTICIPANTS                 |                                                                                                                                                                                                                             |
| Soubrier, M.                     | REVIEW                            | 2014. | MEDICATIONS | GLUCOCORTICOID<br>ESNSAID, MTX,<br>THF ALPHA INH.       | 59 STUDIES                       |                                                                                                                                                                                                                             |
| Ravindran, V.                    | MEHTA-ANALYSIS                    | 2009. | MEDICATIONS | GLUCOCORTICOID<br>ES                                    | 6 STUDIES, 689<br>PARTICIPANTS   | REDUCED<br>POSSIBILITY TO<br>DETECT RARE<br>ADVERSE EFFECTS                                                                                                                                                                 |
| Ruyssen-<br>Witrand, A.          | REVIEW                            | 2011. | MEDICATIONS | GLUCOCORTICOID<br>ES                                    | 37 STUDIES                       | 3 ABSTRACTS                                                                                                                                                                                                                 |
| Agca, R. and<br>EULAR<br>experts | MEHTA-ANALYSIS                    | 2017. | MEDICATIONS | GUIDELINES                                              | 234 RA, 17 AS, 13<br>PsA STUDIES |                                                                                                                                                                                                                             |
| Suissa, S.                       | CASE CONTROL<br>STUDY             | 2006. | MEDICATIONS | DMARD (MTX),<br>GLUCOCORTICOID<br>ESNSAID, COX2<br>INH. | 107908<br>PARTICIPANTS           | CASE CONTROL<br>STUDY, NO AIM<br>OUTCOME<br>ANALYZED,<br>POSSIBLE<br>CONFOUNDING FOR<br>DMARD<br>PRESCRIBING                                                                                                                |
| Rempenault,<br>C.                | MEHTA-ANALYSIS                    | 2018. | MEDICATIONS | HYDROXYCHLORO<br>Q-UINE                                 | 16 STUDIES                       | DANA EXTRACTED<br>BY ONE<br>INVESTIGATOR AND<br>CHECKED BY<br>ANOTHER ONE.                                                                                                                                                  |
| Widdifield, J.                   | PROSPECTIVE<br>COHORT STUDY       | 2019. | MEDICATIONS | MTX                                                     | 23994<br>PARTICIPANTS            | CONFOUNDING<br>WITH MTX DOSAGE<br>AND PRESENCE OF<br>COMORBIDITIES, NO<br>DANA ABOUT<br>OTHER<br>MEDICATIONS WITH<br>POSSIBLE<br>CONFOUNDING<br>EFFECT OR CV RISK<br>FACTORS                                                |
| Micha, R.                        | MEHTA-ANALYSIS                    | 2011. | MEDICATIONS | MTX                                                     | 10 STUDIES                       | OBSERVATIONAL<br>STUDIES - BIAS IS<br>POTENTIALLY<br>EVIDENT(funnel<br>plot, Begg's test, $p = 0.06$ ); EXCLUDING<br>STUDIES WITH<br>EXTREME RISK DID<br>NOT ALTER RESULTS<br>(relative risk 0.81,<br>95% CI 0.74 to 0.89). |
| Morris, S. J.                    | COMPARATIVE<br>STUDY              | 2011. | MEDICATIONS | HYDROXYCHLORO<br>Q-UINE                                 | 706 PARTICIPANTS                 | CONFOUNDERS<br>THAT AFFECT LIPID<br>PROFILE WERE NOT<br>AVAILABLE: FAMILY<br>HISTORY, CENTRAL<br>ADIPOSIITY,<br>PHYSICAL ACTIVITY,<br>NO DIRECT RA                                                                          |

|                                                   |                               |       |                                      |                                                                         |                                 |                                                                                                                                                                                         |
|---------------------------------------------------|-------------------------------|-------|--------------------------------------|-------------------------------------------------------------------------|---------------------------------|-----------------------------------------------------------------------------------------------------------------------------------------------------------------------------------------|
|                                                   |                               |       |                                      |                                                                         |                                 | ACTIVITY MEASURED                                                                                                                                                                       |
| Li, H. Z.                                         | REVIEW OF MEHTA-ANALYSIS      | 2019. | MEDICATIONS                          | HYDROXYCHLORO Q-UINE                                                    | 6 STUDIES, 689 PARTICIPANTS     | METHODOLOGY QUESTIONABLE TO Rempenault, C. MEHTA ANALYSIS                                                                                                                               |
| Charles-Schoeman, C.                              | RANDOMIZED CLINICAL TRIAL     | 2016. | MEDICATIONS                          | MTX, SULAFSALAZOPIRIN, HYDROXYCHLORO Q-UINE                             | 416 PARTICIPANTS                | STUDY INCLUDES EARLY RA WITH HIGH DISEASE ACTIVITY, NAIVE TO DMARDs, ALL SEROPOSITIVE, LIMITED DANA ON GLUCOCORTICOIDs AND STATINS, NO DANA ON CARDIOVASCULAR EXERCISE                  |
| Solomon, D. H.                                    | CASE CONTROL STUDY            | 2006. | MEDICATIONS                          | MTX, BIOLOGICS, GLUCOCORTICOID ESZATHIOPRINE, CYCLOSPORINE, LEFLUNOMIDE | 3501 PARTICIPANTS               | CASE CONTROL STUDY, CONFIDENCE LIMITS ABOUT CV RISK ESTIMATION, POSSIBLE MISCLASSIFICATION OF ELIGIBLE PATIENTS OR CVD, MISDIAGNOSIS OF RA                                              |
| Smolen, J. S. and EULAR TASK experts 2013. update | MEHTA-ANALYSIS FOR GUIDELINES | 2014. | MEDICATIONS                          | GUIDELINES                                                              |                                 |                                                                                                                                                                                         |
| Solomon, D. H.                                    | COMPARATIVE STUDY             | 2013. | MEDICATIONS                          | TNF ALPHA INH, DMARDs                                                   | 20243 PARTICIPANTS              | MISCLASSIFICATION IN ENDPOINT AND EXPOSURE (RA AND CVD), SURVEILLANCE BIAS                                                                                                              |
| Toussiro, E.                                      | EXPERT OPINION OD DRUG SAFETY | 2015. | MEDICATIONS                          | TNF ALPHA INH.                                                          | EXPERT OPINION                  | EXPERT OPINION                                                                                                                                                                          |
| Barnabe, C.                                       | MEHTA-ANALYSIS                | 2011. | MEDICATIONS                          | TNF ALPHA INH.                                                          | 16 STUDIES, 108328 PARTICIPANTS | HETEROGENEITY AMONG COHORT STUDIES, POSSIBLE PUBLICATION BIAS. EFFECT FROM RCT IS UNDERPOWERED WITH WIDE 95% CIs AND CVD WERE SECONDARY OUTCOMES, RCT HAVE TREAD TOWARDS DECREASED RISK |
| Jacobsson, L. T. H.                               | PROSPECTIVE COHORT STUDY      | 2005. | MEDICATIONS                          | TNF ALPHA INH.                                                          | 983 PARTICIPANTS                |                                                                                                                                                                                         |
| Ljung, L.                                         | PROSPECTIVE STUDY             | 2016. | MEDICATIONS                          | TNF ALPHA INH.                                                          | 41093 PARTICIPANTS              |                                                                                                                                                                                         |
| Karpouzas, G. A.                                  | PROSPECTIVE STUDY             | 2020. | CHRONIC INFLAMMATION AND MEDICATIONS | BIOLOGICS                                                               | 100 PARTICIPANTS                |                                                                                                                                                                                         |

|                   |                               |       |             |                                                                 |                                         |                                                                                                                                                                                                                                                                                                |
|-------------------|-------------------------------|-------|-------------|-----------------------------------------------------------------|-----------------------------------------|------------------------------------------------------------------------------------------------------------------------------------------------------------------------------------------------------------------------------------------------------------------------------------------------|
| Singh, S.         | MEHTA-ANALYSIS                | 2020. | MEDICATIONS | TNF ALPHA INH,<br>NON-TNF ALPHA<br>INH, DMARDs<br>(TOCILIZUMAB) | 26 STUDIES, ><br>220000<br>PARTICIPANTS | OBSERVATIONAL<br>STUDIES, ONE<br>RANDOMIZED<br>CLINICAL TRIAL<br>COMPARED CV<br>SAFETY OF<br>TOCILIZUMAB AND<br>ETANERCEPT,<br>POSSIBLE<br>CONFOUNDING<br>REGARDING<br>MEDICATIONS FOR<br>RA AND<br>COMORBIDITIES<br>PRESCRIBING,<br>POSSIBLE<br>PUBLICATION BIAS,<br>UNCERTAIN RA<br>DURATION |
| Chung, E. S.      | PROSPECTIVE<br>CLINICAL TRIAL | 2003. | MEDICATIONS | INFLIXIMAB                                                      | 150 PARTICIPANTS                        |                                                                                                                                                                                                                                                                                                |
| Leporini, C.      | MEHTA-ANALYSIS                | 2018. | MEDICATIONS | TNF ALPHA INH.                                                  | 12 STUDIES                              |                                                                                                                                                                                                                                                                                                |
| Castagne, B.      | MEHTA-ANALYSIS                | 2019. | MEDICATIONS | TOCILIZUMAB                                                     | 19 STUDIES, ><br>110000<br>PARTICIPANTS | HETEROGENEITY<br>FOR MACE<br>OUTCOMES, NO<br>DATA FOR BASELINE<br>CV RISK, TRANSIVITY<br>HYPOTHESIS HAS<br>NOT BE TESTED                                                                                                                                                                       |
| Divonne, M.<br>D. | MEHTA-ANALYSIS                | 2017. | MEDICATIONS | TNF ALPHA INH.                                                  | 27 STUDIES                              |                                                                                                                                                                                                                                                                                                |
| Cheung, T. T.     | MEHTA-ANALYSIS                | 2015. | MEDICATIONS | TNF ALPHA INH.                                                  | 20 STUDIES                              |                                                                                                                                                                                                                                                                                                |
| Daïen, C. I.      | MEHTA-ANALYSIS                | 2012. | MEDICATIONS | TNF ALPHA INH.                                                  | 13 S                                    |                                                                                                                                                                                                                                                                                                |
| Zhao, Q. W.       | MEHTA-ANALYSIS                | 2015. | MEDICATIONS | TNF ALPHA INH.                                                  | 11 STUDIES, 6321<br>PARTICIPANTS        | STRICT INCLUSION<br>AND EXCLUSION<br>CRITERIA FOR<br>ANALYZED TRIALS,<br>POOLED DANA<br>TENDS TO<br>OVERESTIMATE OR<br>UNDERESTIMATE<br>TREATMENT<br>EFFECT,<br>HETEROGENEITY OF<br>ANALYZED TRIALS.                                                                                           |
| Kim, S. K.        | PROSPECTIVE<br>STUDY          | 2020. | MEDICATIONS | TOCILIZUMAB,<br>ABATACEPT                                       | 996 PARTICIPANTS                        | POSSIBLE<br>INACCURATE HA<br>DIAGNOSIS, NO<br>OTHER CV RISK<br>FACTORS WERE<br>ASSED                                                                                                                                                                                                           |
| Desai, R. J.      | PROSPECTIVE<br>STUDY          | 2016. | MEDICATIONS | TNF ALPHA INH,<br>NONBIOLOGICS -<br>MTX                         | 7222 PARTICIPANTS                       | NO DATA ON RA<br>ACTIVITY, POSSIBLE<br>MISCLASSIFICATION<br>BIAS ON DIAGNOSES<br>OF RA AND<br>COMORBIDITIES                                                                                                                                                                                    |

|                        |                          |       |             |                  |                    |                                                                                                                                                                                                                                                                                                                |
|------------------------|--------------------------|-------|-------------|------------------|--------------------|----------------------------------------------------------------------------------------------------------------------------------------------------------------------------------------------------------------------------------------------------------------------------------------------------------------|
| Jin, Y. Z.             | PROSPECTIVE STUDY        | 2018. | MEDICATIONS | ABATACEPT        | 13036 PARTICIPANTS | OBSERVATIONAL STUDY, POSSIBLE CONFOUNDING BY PARTIALLY MEASURED OR UNMEASURED PARAMETERS, NO MEASURED DISEASE ACTIVITY, LIMITED STATISTICAL POWER IN SOME SECONDARY ANALYSES, POSSIBLE MISCLASSIFICATION IN OUTCOMES AND COMORBIDITIES, PROBLEMS WITH BASELINE RA SEVERITY AND DURATION AND CV RISK ESTIMATION |
| Schiff, M. H.          | CLINICAL TRIAL           | 2011. | MEDICATIONS | TOCILIZUMAB      | 8580 PARTICIPANTS  | STRICT ENROLMENT CRITERIA AND MONITORING IN CLINICAL TRIAL SETTING                                                                                                                                                                                                                                             |
| Fleischmann, R.        | CLINICAL TRIAL           | 2019. | MEDICATIONS | SARILUMAB        | 3509 PARTICIPANTS  |                                                                                                                                                                                                                                                                                                                |
| Ikonomidis, I.         | RANDOMIZED CONTROL TRIAL | 2008. | MEDICATIONS | ANAKIRA          | 42 PARTICIPANTS    | NO EXPLORATION OF CAUSALITY BETWEEN ANAKIRA VASCULAR AD LIVER FUNCTION, NO CORONARY DISEASE EXPLORED, NONINVASIVE ASSESSMENT OF VASCULAR AND LIVER FUNCTION, IMPROVED PHYSICAL ACTIVITY REDUCED DAS28 SCORE                                                                                                    |
| van Vollenhoven, R. F. | CLINICAL TRIAL           | 2013. | MEDICATIONS | RITUXIMAB        | 3194 PARTICIPANTS  | DATA POOLED FROM DIVERSE STUDIES, WITH 2 STUDIES WERE PATIENTS RECEIVED ONE OR TWO RITUXIMAB DOSES, EXCLUDED SEVERE COMORBIDITIES AT BASELINE, SHORT OBSERVATION PERIOD FOR PLACBEO+MTX                                                                                                                        |
| Day, A. L.             | REVIEW                   | 2019. | MEDICATIONS | DMARD            | 83 STUDIES         |                                                                                                                                                                                                                                                                                                                |
| McInnes, I. B.         | CLINICAL TRIAL           | 2015. | MEDICATIONS | TOCILIZUMAB      | 132 PARTICIPANTS   |                                                                                                                                                                                                                                                                                                                |
| Tanaka, Y.             | CLINICAL TRIAL           | 2011. | MEDICATIONS | MTX, TOFACITINIB | 140 PARTICIPANTS   |                                                                                                                                                                                                                                                                                                                |

|                    |                            |       |             |                          |                                   |                                                                                                                                                                        |
|--------------------|----------------------------|-------|-------------|--------------------------|-----------------------------------|------------------------------------------------------------------------------------------------------------------------------------------------------------------------|
| Taylor, P. C.      | CLINICAL TRIAL             | 2019. | MEDICATIONS | BARICITINIB              | 3492 PARTICIPANTS                 | DVT/PE WERE NOT ASSES, NOT ALL ADVERSE EVENTS WERE DIAGNOSED BY IMAGING TOOLS, RESTRICTED DURATION MAY LIMIT DETECTION OF RARE ADVERSE EVENTS.                         |
| Souto, A.          | MEHTA-ANALYSIS             | 2015. | MEDICATIONS | TOCILIZUMAB, TOFACITINIB | 25 STUDIES, > 4700 PARTICIPANTS   | NO DATA FOR OTHER BIOLOGICS IN RA OR SpA                                                                                                                               |
| Zhang, J.          | RETROSPECTIVE COHORT STUDY | 2016. | MEDICATIONS | ABATACEPT, ANTI TNF INH. | 47193 PARTICIPANTS                | RETROSPECTIVE STUDY                                                                                                                                                    |
| Myasoedova, E.     | MEHTA-ANALYSIS             | 2019. | MEDICATIONS | STATINS                  | 8 STUDIES, > 1800000 PARTICIPANTS | 5 COHORT, 3 CASE CONTROL                                                                                                                                               |
| Soulaidopoulos, S. | REVIEW                     | 2018. | MEDICATIONS | STATINS                  | 11 STUDIES                        | DIFFICULTY IN ASSESSING STATIN EFFECT ON INFLAMMATION                                                                                                                  |
| Danninger, K.      | REVIEW                     | 2014. | MEDICATIONS | STATINS                  | 4896 PARTICIPANTS                 |                                                                                                                                                                        |
| Xing, B.           | MEHTA-ANALYSIS             | 2015. | MEDICATIONS | STATINS                  | 13 STUDIES, 737 PARTICIPANTS      | 2 STUDIES BASED ONLY ON CRP OR ESR, ALL WERE CONDUCTED IN ONE HOSPITAL WITH SMALL NUMBER OF PATIENTS, HETEROGENEITY IN STATIN TYPES, DOSAGE AND RA ACTIVITY ASSESSMENT |
